# Supplementary material for: Effect of activated carbon electrode material characteristics on hardness control performance of membrane capacitive deionization
Source: Royal Society of Chemistry journal article supplement (doi:10.1039/d3ra05615e), 2023-01-01
Supplement: d3ra05615e1.pdf [file d3ra05615e1.pdf]

1 **Supplementary information**

2

3

4

5 **Effect of Activated Carbon Electrode Material Characteristics on Hardness Control**  
6 **Performance of Membrane Capacitive Deionization**

7 Hongsik Yoon,<sup>a\*</sup> Taijin Min,<sup>a</sup> Sung-Hwan Kim,<sup>a</sup> Gunhee Lee,<sup>a</sup> Dasom Oh,<sup>b</sup> Dong-Chan Choi,<sup>b</sup> Seongsoo  
8 Kim<sup>b</sup>

9 <sup>a</sup>Department of Sustainable Environment Research, Korea Institute of Machinery & Materials, Daejeon  
10 34103, Republic of Korea

11 <sup>b</sup>EHS Research Center, Samsung Electronics Co., Ltd., Gyeonggi-do 18448, Republic of Korea

12 \* Corresponding author: Hongsik Yoon, Email: yoonhs@kimm.re.kr, Phone: +82-42-868-7891

13

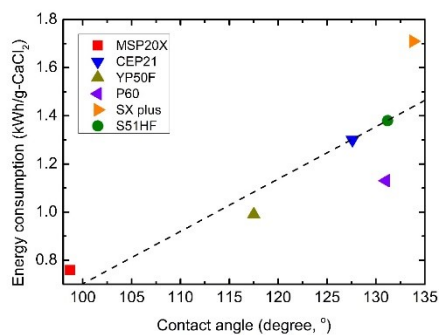

(a)

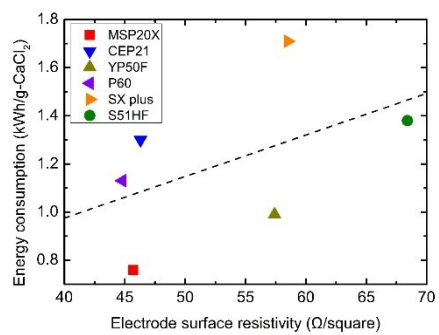

(b)

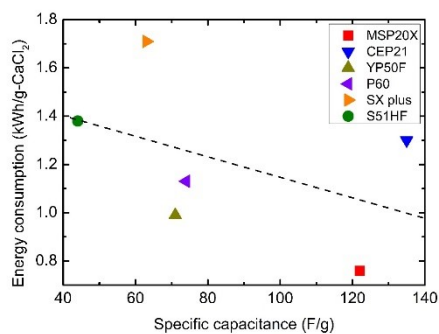

(c)

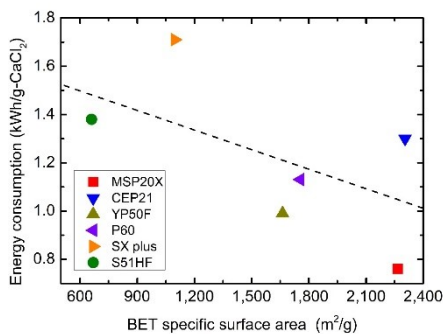

(d)

1

2

3

4

5 **Fig. S1** Energy consumption of MCDI for hardness control with respect to (a,b) contact angle, (c,d) surface  
 6 resistivity, (e,f) specific capacitance, and (g,h) BET-specific surface area. The dashed line represents the  
 7 trend line. (Flow rate: 2 mL/min, Feed: 6.25 mM CaCl<sub>2</sub>, and Temp.: 25 °C)

8
